# Supplementary material for: Temperature-dependent helix–helix transition of an optically active poly(diarylsilylene)
Source: Royal Society of Chemistry journal article supplement (doi:10.1039/a909368k), 2000-01-01
Supplement: a909368k.doc [file a909368k.doc]

**Supplementary information**

**1. Polymer synthesis.** **1** - **3** were synthesized according to the normal Wurtz coupling technique for polysilanes. The synthesis of **1** is representative: poly[{bis*-*3-(*S*)-2-methylbutylphenyl}0.2-*co*-(bis*-*4*-*butylphenyl)0.8]silylene, **1**, was prepared by addition of a mixture of the comonomers, dichloro-bis[3-(*S*)-2-methylbutylphenyl]silaneS1 (0.2 equivs.) and dichloro-bis(4*-*butylphenyl)silane (0.8 equivs.), to a flask containing 2.5 equivalents of sodium dispersed in toluene with stirring at 70C. After 2.5 hours, the viscous purple mixture was diluted with toluene and filtered through a 10m Teflon filter. The high molecular weight (Mw) fraction (Mw = 474,000; yield 5.9%) was isolated by centrifugation after fractional precipitation in a mixed isopropanol-toluene solution and vacuum dried at 80C for 24 hours.

**2. Table** **of fluorescence excitation and NMR**S2 **data** for **1** - **3**.

| Cmpd | FL-EX **max /nm | NMR  (ppm) | |
| --- | --- | --- | --- |
| 29Si | 13C |
| **1** | 398.5 | -31.4 | 11.5, 14.3, 19.2, 22.8, 29.8, 34.1, 36.2, 36.7, 43.8 |
| **2** | 400.5 | -32.9 | 11.5, 14.2, 19.1, 22.8, 29.7, 33.9, 36.1, 36.7, 43.7 |
| **3** | 396.0 | -34.4 | 11.5, 14.0, 19.2, 22.8, 29.7, 33.7, 36.2, 36.7, 43.8 |

**References**

S1 J. R. Koe, M. Fujiki and H. Nakashima, *J. Am. Chem. Soc.*, 1999, **121**, 9734.

S2 NMR spectra were recorded on a Varian Unity 300 spectrometer at 80C relative to internal TMS in toluene-d8 for silicon-29 at 59.591 MHz and for carbon-13 at 75.431 MHz for low Mw fractions of **1** and **3**, and for the high Mw fraction of **2**. Peak integrations indicate correlation of copolymer compositions and nominal addition ratios.
